# Supplementary material for: Epigenetic Diversity of Clonal White Poplar (Populus alba L.) Populations: Could Methylation Support the Success of Vegetative Reproduction Strategy?
Source: PubMed Central journal article supplement (PMC4492942; doi:10.1371/journal.pone.0131480), 2015-07-06
Supplement: pone.0131480.s003.pdf [file pone.0131480.s003.pdf]

Table S1

| Sample name | Population | UTME (WGS84) | UTMN (WGS84) | Geographical zone | Altitude (m)  | City                         | Assigned genotype by Brundu et al . (2008) |
|-------------|------------|--------------|--------------|-------------------|---------------|------------------------------|--------------------------------------------|
| 2J22        | Pop1       | 491648       | 4520290      | 32T               | 39,01         | Perfugas                     | J22                                        |
| 2bisJ22     | Pop1       | 488763       | 4532421      | 32T               | 14,33         | Padulo (Badesi)              | J22                                        |
| 3J1         | Pop2       | 488758       | 4532419      | 32T               | 14,02         | Padulo (Badesi)              | J1                                         |
| 4J1         | Pop2       | 488861       | 4532362      | 32T               | 11,28         | Padulo (Badesi)              | J1                                         |
| 5J1         | Pop2       | 488874       | 4532372      | 32T               | 8,53          | Padulo (Badesi)              | J1                                         |
| 6J1         | Pop2       | 491208       | 4528397      | 32T               | 9,45          | Viddalba                     | J1                                         |
| 7J20        | Pop3       | 491231       | 4528417      | 32T               | -3,05         | Viddalba                     | J20                                        |
| 8J20        | pop3       | 494757       | 4524140      | 32T               | 60,05         | Fraigata                     | J20                                        |
| 9N/A        | Pop4       | 494738       | 4524178      | 32T               | 56,39         | Fraigata                     | NOT ASSIGNED                               |
| 10N/A       | Pop4       | 494455       | 4523545      | 32T               | 44,50         | Tiesennari                   | NOT ASSIGNED                               |
| 11J20       | Pop5       | 494421       | 4523564      | 32T               | 38,10         | Tiesennari                   | J20                                        |
| 12J20       | Pop5       | 494430       | 4523391      | 32T               | 34,44         | La Fraigata                  | J20                                        |
| 13N/A       | Pop6       | 494395       | 4523384      | 32T               | 34,75         | La Fraigata                  | NOT ASSIGNED                               |
| 14N/A       | Pop6       | 490202       | 4519413      | 32T               | 52,12         | Perfugas                     | NOT ASSIGNED                               |
| 15N/a       | Pop7       | 490084       | 4519471      | 32T               | 55,47         | Perfugas                     | NOT ASSIGNED                               |
| 16N/a       | Pop7       | 490124       | 4519456      | 32T               | 56,69         | Perfugas                     | NOT ASSIGNED                               |
| 17N/a       | Pop7       | 490180       | 4519430      | 32T               | 54,25         | Perfugas                     | NOT ASSIGNED                               |
| 18N/a       | Pop7       | 485516       | 4509927      | 32T               | 338,63        | Chiaromonti                  | NOT ASSIGNED                               |
| 19N/a       | Pop8       | 485538       | 4509901      | 32T               | 335,58        | Chiaromonti                  | NOT ASSIGNED                               |
| 20N/a       | Pop8       | 465450       | 4505511      | 32T               | 160,00        | Scala di Giocca SS           | NOT ASSIGNED                               |
| 23N/A       | Pop9       | 465450       | 4505511      | 32T               | 160,00        | Scala di Giocca SS           | NOT ASSIGNED                               |
| 24N/A       | Pop9       | 468836       | 4504181      | 32T               | 160,00        | S. Martino SS                | NOT ASSIGNED                               |
| 26N/a       | Pop10      | 468836       | 4504181      | 32T               | 160,00        | S. Martino SS                | NOT ASSIGNED                               |
| 27N/a       | Pop10      | 468836       | 4504181      | 32T               | 160,00        | S. Martino SS                | NOT ASSIGNED                               |
| 28N/a       | Pop10      | 469044       | 4503992      | 32T               | 160,00        | Rio Mascari                  | NOT ASSIGNED                               |
| 29N/a       | Pop11      | 469044       | 4503992      | 32T               | 160,00        | Rio Mascari                  | NOT ASSIGNED                               |
| 30N/a       | Pop11      | 469044       | 4503992      | 32T               | 160,00        | Rio Mascari                  | NOT ASSIGNED                               |
| 31N/a       | Pop11      | 469044       | 4503992      | 32T               | 160,00        | Rio Mascari                  | NOT ASSIGNED                               |
| 32N/a       | Pop11      | 469444       | 4504125      | 32T               | 160,00        | Rio Mascari                  | NOT ASSIGNED                               |
| 33N/a       | Pop12      | 467118       | 4504478      | 32T               | 265,00        | Muros                        | NOT ASSIGNED                               |
| 33bisN/a    | Pop12      | 467118       | 4504478      | 32T               | 265,00        | Muros                        | NOT ASSIGNED                               |
| 37N/a       | Pop13      | 473605       | 4501663      | 32T               | 230,00        | Saccargia                    | NOT ASSIGNED                               |
| 38N/a       | Pop13      | 473605       | 4501663      | 32T               | 230,00        | Saccargia                    | NOT ASSIGNED                               |
| 39N/a       | Pop14      | 481892       | 4488131      | 32T               | 300,00        | Sorgente Malis               | NOT ASSIGNED                               |
| 40N/a       | Pop14      | 481892       | 4488131      | 32T               | 300,00        | Sorgente Malis               | NOT ASSIGNED                               |
| 41N/a       | Pop15      | 479097       | 4486685      | 32T               | 459,00        | Bonnanaro                    | NOT ASSIGNED                               |
| 42N/a       | Pop15      | 478967       | 4486574      | 32T               | 459,00        | Bonnanaro                    | NOT ASSIGNED                               |
| 44N/a       | Pop16      | 478967       | 4486574      | 32T               | 459,00        | Bonnanaro                    | NOT ASSIGNED                               |
| 45N/a       | Pop16      | 472486       | 4422572      | 32S               | 13,00         | Solarussa                    | NOT ASSIGNED                               |
| 46N/a       | Pop16      | 472486       | 4422572      | 32S               | 13,00         | Solarussa                    | NOT ASSIGNED                               |
| 48N/a       | Pop17      | 472486       | 4422572      | 32S               | 13,00         | Solarussa                    | NOT ASSIGNED                               |
| 49N/a       | Pop17      | 480169       | 4399277      | 32S               | 300,00        | Morgongiori                  | NOT ASSIGNED                               |
| 50N/a       | Pop17      | 480169       | 4399277      | 32S               | 300,00        | Morgongiori                  | NOT ASSIGNED                               |
| 51.1J9      | Pop18      | 480169       | 4399277      | 32S               | 300,00        | Morgongiori                  | J9                                         |
| 51.2J9      | Pop18      | 480169       | 4399277      | 32S               | 300,00        | Morgongiori                  | J9                                         |
| 51.3J9      | Pop18      | 480169       | 4399277      | 32S               | 300,00        | Morgongiori                  | J9                                         |
| 51.4J9      | Pop18      | 480169       | 4399277      | 32S               | 300,00        | Morgongiori                  | J9                                         |
| 51.5J9      | Pop18      | 480169       | 4399277      | 32S               | 300,00        | Morgongiori                  | J9                                         |
| 51.6J9      | Pop18      | 502332       | 4410703      | 32S               | 350,00        | Laconi                       | J9                                         |
| 51.7J9      | Pop18      | 502332       | 4410703      | 32S               | 350,00        | Laconi                       | J9                                         |
| 52.1J14/J15 | Pop19      | 502332       | 4410703      | 32S               | 350,00        | Laconi                       | J14 or J15                                 |
| 52.2J14/J15 | Pop19      | 502332       | 4410703      | 32S               | 350,00        | Laconi                       | J14 or J15                                 |
| 52.3J14/J15 | Pop19      | 502332       | 4410703      | 32S               | 350,00        | Laconi                       | J14 or J15                                 |
| 52.4J14/J15 | Pop19      | 502332       | 4410703      | 32S               | 350,00        | Laconi                       | J14 or J15                                 |
| 52.5J14/J15 | Pop19      | 502332       | 4410703      | 32S               | 350,00        | Laconi                       | J14 or J15                                 |
| 52.6J14/J15 | Pop19      | 494464       | 4407887      | 32S               | 200,00        | Senis                        | J14 or J15                                 |
| 53.1J14     | Pop20      | 494464       | 4407887      | 32S               | 200,00        | Senis                        | J14                                        |
| 53.2J14     | Pop20      | 494464       | 4407887      | 32S               | 200,00        | Senis                        | J14                                        |
| 53.4J14     | Pop20      | 494464       | 4407887      | 32S               | 200,00        | Senis                        | J14                                        |
| 53.4BISJ14  | Pop20      | 494464       | 4407887      | 32S               | 200,00        | Senis                        | J14                                        |
| 53.5J14     | Pop20      | 494464       | 4407887      | 32S               | 200,00        | Senis                        | J14                                        |
| 53.6J14     | Pop20      | 494464       | 4407887      | 32S               | 200,00        | Senis                        | J14                                        |
| 54.1J9      | Pop21      | 488706       | 4405302      | 32S               | 212,00        | Escovedu                     | J9                                         |
| 54.2J9      | Pop21      | 488706       | 4405302      | 32S               | 212,00        | Escovedu                     | J9                                         |
| 54.3J9      | Pop21      | 488706       | 4405302      | 32S               | 212,00        | Escovedu                     | J9                                         |
| 54.4J9      | Pop21      | 488706       | 4405302      | 32S               | 212,00        | Escovedu                     | J9                                         |
| 54.5J9      | Pop21      | 488706       | 4405302      | 32S               | 212,00        | Escovedu                     | J9                                         |
| 54.11J9     | Pop21      | 488706       | 4405302      | 32S               | 212,00        | Escovedu                     | J9                                         |
| 54.13J9     | Pop21      | 488706       | 4405302      | 32S               | 212,00        | Escovedu                     | J9                                         |
| 54.14J9     | Pop21      | 488706       | 4405302      | 32S               | 212,00        | Escovedu                     | J9                                         |
| 55H22       | Pop22      | 490039       | 4305946      | 32S               | Not available | Torre di Chia                | H22                                        |
| 59H22       | Pop22      | 490039       | 4305946      | 32S               | Not available | Torre di Chia                | H22                                        |
| 60H22       | Pop23      | 489442       | 4306389      | 32S               | Not available | Chia                         | H22                                        |
| 61H22       | Pop23      | 489442       | 4306389      | 32S               | Not available | Chia                         | H22                                        |
| 62H22       | Pop23      | 489442       | 4306389      | 32S               | Not available | Chia                         | H22                                        |
| 63H22       | Pop23      | 489442       | 4306389      | 32S               | Not available | Chia                         | H22                                        |
| 64H22       | Pop23      | 489442       | 4306389      | 32S               | Not available | Chia                         | H22                                        |
| 66H22       | Pop24      | 477782       | 4315299      | 32S               | Not available | Teulada                      | H22                                        |
| 67H22       | Pop24      | 477782       | 4315299      | 32S               | Not available | Teulada                      | H22                                        |
| PA29J1      | Pop25      | 460233       | 4504438      | 32T               | 65            | Stazione Molaf (Riu Mascari) | J1                                         |
| PA30J1      | Pop25      | 460202       | 4504434      | 32T               | 69            | Stazione Molaf (Riu Mascari) | J1                                         |
| PA31J1      | Pop25      | 460112       | 4504411      | 32T               | 62            | Stazione Molaf (Riu Mascari) | J1                                         |
| PA32J1      | Pop26      | 459819       | 4498429      | 32T               | 194           | N.a S.a de Paulisi (Uri)     | J1                                         |
| PA33J1      | Pop26      | 459832       | 4498427      | 32T               | 195           | N.a S.a de Paulisi (Uri)     | J1                                         |
| PA34J1      | Pop26      | 459827       | 4498411      | 32T               | 198           | N.a S.a de Paulisi (Uri)     | J1                                         |
