# Supplementary material for: Epigenetic Diversity of Clonal White Poplar (Populus alba L.) Populations: Could Methylation Support the Success of Vegetative Reproduction Strategy?
Source: PLoS One. 2015 Jul 6;10(7):e0131480. doi: 10.1371/journal.pone.0131480 (PMC4492942; doi:10.1371/journal.pone.0131480)
Supplement: S5 Table — (XLSX) [file pone.0131480.s007.xlsx]

## Sheet: Foglio1
	1	2	3	4	5	6	7	8	9	10	11	12	13	14	15	16	17	18	19	20	21	22	23	24	25	26	27	28	29	30	31	32	33	34	35	36	37	38	39	40	41	42	43	44	45	46	47	48	49
1	0
2	0	0
3	5	5	0
4	10	10	-23	0
5	4	4	-21	-22	0
6	12	12	-21	-18	-12	0
7	-25	-25	-6	-13	-11	-7	0
8	-23	-23	-12	-11	-17	-5	-26	0
9	-25	-25	-16	-15	-19	-11	-38	-30	0
10	-27	-27	-6	-15	-11	-7	-34	-28	-36	0
11	-22	-22	-5	-8	-14	-4	-31	-23	-35	-13	0
12	-23	-23	-4	-13	-9	-5	-30	-24	-32	-10	-11	0
13	-29	-29	-8	-17	-13	-9	-38	-30	-40	-6	-15	-14	0
14	-28	-28	-7	-16	-12	-8	-37	-31	-37	-3	-14	-13	-5	0
15	-46	-46	-41	-38	-38	-42	-53	-63	-59	-53	-52	-57	-53	-54	0
16	-49	-49	-40	-41	-37	-43	-56	-64	-58	-52	-55	-56	-52	-51	-9	0
17	-47	-47	-46	-45	-39	-43	-60	-68	-62	-60	-59	-62	-60	-61	-15	-22	0
18	-52	-52	-47	-48	-42	-46	-63	-69	-65	-63	-62	-67	-63	-62	-20	-25	-7	0
19	-47	-47	-42	-45	-37	-43	-60	-68	-62	-58	-61	-62	-60	-57	-27	-28	-26	-21	0
20	-49	-49	-44	-47	-39	-45	-62	-70	-64	-60	-63	-64	-62	-59	-25	-26	-24	-19	-2	0
21	-12	-12	-33	-34	-32	-30	-9	-7	-19	-3	-10	-7	-3	-2	-46	-45	-51	-52	-47	-49	0
22	-16	-16	-35	-38	-32	-32	-9	-15	-27	-15	-20	-11	-13	-14	-42	-43	-47	-50	-43	-45	-12	0
23	-40	-40	-57	-58	-52	-58	-49	-57	-53	-49	-48	-51	-49	-48	-20	-19	-23	-20	-7	-9	-70	-66	0
24	-38	-38	-55	-54	-50	-56	-45	-53	-51	-45	-46	-49	-45	-44	-18	-17	-23	-18	-7	-9	-66	-64	-8	0
25	-38	-38	-55	-54	-50	-56	-45	-53	-51	-45	-46	-49	-45	-44	-18	-17	-23	-18	-7	-9	-66	-64	-8	0	0
26	-44	-44	-59	-56	-54	-58	-53	-59	-57	-51	-50	-55	-49	-50	-12	-15	-13	-8	-5	-3	-68	-62	-22	-24	-24	0
27	-44	-44	-59	-56	-54	-58	-53	-59	-57	-51	-50	-55	-49	-50	-12	-15	-13	-8	-5	-3	-68	-62	-22	-24	-24	0	0
28	-44	-44	-59	-56	-54	-58	-53	-59	-57	-51	-50	-55	-49	-50	-12	-15	-13	-8	-5	-3	-68	-62	-22	-24	-24	0	0	0
29	-44	-44	-59	-56	-54	-58	-53	-59	-57	-51	-50	-55	-49	-50	-12	-15	-13	-8	-5	-3	-68	-62	-22	-24	-24	0	0	0	0
30	-36	-36	-53	-48	-44	-48	-49	-57	-53	-43	-46	-47	-43	-40	-14	-19	-19	-18	-13	-13	-58	-54	-28	-24	-24	-24	-24	-24	-24	0
31	-36	-36	-53	-48	-44	-48	-49	-57	-53	-43	-46	-47	-43	-40	-14	-19	-19	-18	-13	-13	-58	-54	-28	-24	-24	-24	-24	-24	-24	0	0
32	-41	-41	-58	-55	-51	-57	-48	-54	-48	-50	-45	-52	-50	-49	-7	-10	-12	-9	-6	-4	-65	-61	-17	-19	-19	-7	-7	-7	-7	-27	-27	0
33	-41	-41	-58	-57	-51	-57	-46	-52	-48	-48	-45	-50	-48	-47	-7	-8	-12	-9	-6	-4	-65	-61	-19	-21	-21	-9	-9	-9	-9	-29	-29	0	0
34	-50	-50	-41	-38	-34	-40	-59	-71	-63	-59	-60	-61	-55	-56	-18	-19	-21	-22	-23	-21	-44	-38	-14	-10	-10	-10	-10	-10	-10	-4	-4	-13	-13	0
35	-50	-50	-41	-38	-34	-40	-59	-71	-63	-59	-60	-61	-55	-56	-18	-19	-21	-22	-23	-21	-44	-38	-14	-10	-10	-10	-10	-10	-10	-4	-4	-13	-13	0	0
36	-52	-52	-43	-40	-36	-42	-65	-73	-61	-65	-66	-69	-65	-64	-18	-19	-21	-22	-27	-25	-52	-46	-12	-8	-8	-6	-6	-6	-6	-8	-8	-9	-9	-10	-10	0
37	-52	-52	-43	-40	-36	-42	-65	-73	-61	-65	-66	-69	-65	-64	-18	-19	-21	-22	-27	-25	-52	-46	-12	-8	-8	-6	-6	-6	-6	-8	-8	-9	-9	-10	-10	0	0
38	-51	-51	-46	-41	-41	-43	-64	-70	-66	-70	-63	-70	-68	-69	-19	-20	-18	-19	-22	-22	-61	-53	-9	-11	-11	-5	-5	-5	-5	-19	-19	-4	-4	-27	-27	-23	-23	0
39	-33	-33	-36	-35	-35	-37	-44	-54	-52	-50	-47	-50	-52	-51	-19	-18	-24	-25	-20	-18	-51	-43	-15	-13	-13	-7	-7	-7	-7	-15	-15	-4	-6	-17	-17	-15	-15	-8	0
40	-30	-30	-37	-32	-32	-34	-43	-53	-55	-51	-46	-49	-53	-52	-14	-13	-17	-16	-13	-11	-50	-42	-10	-6	-6	-4	-4	-4	-4	-8	-8	-7	-9	-8	-8	-8	-8	-5	-9	0
41	-23	-23	-26	-27	-19	-27	-30	-40	-40	-32	-31	-36	-32	-33	-7	-8	-10	-9	-2	-2	-41	-39	7	7	7	-1	-1	-1	-1	-5	-5	0	-2	-7	-7	-5	-5	-2	-6	-7	0
42	-24	-24	-31	-30	-24	-30	-33	-41	-43	-33	-32	-37	-33	-34	-6	-9	-11	-10	-5	-5	-46	-44	4	4	4	-4	-4	-4	-4	-6	-6	1	-1	-8	-8	-6	-6	-3	-7	-10	9	0
43	-30	-30	-37	-32	-26	-34	-43	-45	-47	-39	-40	-41	-39	-38	-12	-11	-11	-10	-9	-7	-46	-44	-2	-2	-2	-8	-8	-8	-8	-8	-8	-7	-9	-10	-10	-8	-8	-7	-13	-18	-9	-6	0
44	-11	-11	-4	-11	-7	-5	-8	-4	-14	22	11	14	20	19	-43	-44	-50	-53	-48	-50	5	-3	-41	-37	-37	-37	-37	-37	-37	-35	-35	-40	-40	-41	-41	-49	-49	-54	-40	-45	-40	-43	-51	0
45	-7	-7	-4	-7	-7	-1	-10	0	-12	16	15	12	16	15	-47	-48	-54	-57	-56	-58	1	-9	-45	-41	-41	-43	-43	-43	-43	-39	-39	-40	-40	-45	-45	-51	-51	-54	-44	-47	-38	-41	-47	-4	0
46	-9	-9	-6	-13	-11	-7	-8	0	-10	20	15	18	18	17	-47	-48	-54	-57	-52	-54	5	-3	-45	-41	-41	-41	-41	-41	-41	-39	-39	-44	-46	-45	-45	-53	-53	-58	-42	-47	-44	-47	-53	-6	-8	0
47	-15	-15	-8	-15	-11	-9	-10	-6	-14	20	11	12	22	21	-45	-42	-50	-53	-48	-50	5	-5	-41	-37	-37	-39	-39	-39	-39	-35	-35	-42	-42	-39	-39	-49	-49	-54	-42	-47	-40	-45	-51	-4	-4	-8	0
48	-15	-15	-8	-17	-13	-11	-12	-8	-16	16	9	10	18	17	-45	-42	-48	-51	-44	-46	3	-7	-37	-35	-35	-37	-37	-37	-37	-35	-35	-40	-40	-39	-39	-49	-49	-52	-42	-47	-38	-43	-49	-8	-8	-12	-4	0
49	-15	-15	-10	-15	-9	-9	-18	-10	-20	10	5	6	10	11	-47	-44	-46	-49	-46	-48	3	-9	-39	-35	-35	-39	-39	-39	-39	-37	-37	-40	-40	-43	-43	-51	-51	-56	-44	-43	-34	-39	-49	-12	-14	-14	-8	-10	0
50	-20	-20	-13	-18	-14	-12	-15	-13	-19	1	-4	-1	-5	0	-46	-43	-51	-52	-45	-45	-4	-4	-40	-38	-38	-38	-38	-38	-38	-40	-40	-37	-37	-46	-46	-48	-48	-53	-37	-40	-43	-48	-50	-21	-25	-23	-23	-25	-23
51	-7	-7	-12	-15	-17	-11	-6	-2	-8	-6	-5	-4	-6	-5	-59	-56	-62	-63	-54	-56	9	3	-57	-51	-51	-59	-59	-59	-59	-49	-49	-54	-56	-51	-51	-61	-61	-64	-48	-47	-52	-49	-53	-8	-6	-2	-6	-10	-10
52	19	19	13	10	8	14	25	29	23	25	26	27	25	26	-28	-25	-31	-32	-23	-25	36	30	-28	-22	-22	-29	-29	-29	-29	-20	-20	-27	-29	-20	-20	-31	-31	-34	-19	-18	-25	-25	-28	19	22	25	21	17	18
53	-13	-13	-16	-19	-17	-13	-12	-8	-24	-6	-13	-8	-4	-5	-51	-50	-56	-55	-50	-52	19	15	-51	-45	-45	-47	-47	-47	-47	-39	-39	-48	-48	-41	-41	-51	-51	-62	-48	-45	-50	-45	-45	-6	-6	-4	-6	-10	-8
54	-10	-10	-15	-16	-16	-12	-13	-9	-25	-5	-10	-5	-3	-4	-54	-53	-59	-60	-55	-57	16	12	-56	-50	-50	-52	-52	-52	-52	-44	-44	-51	-51	-46	-46	-56	-56	-67	-51	-50	-53	-48	-48	-5	-5	-1	-5	-9	-7
55	-13	-13	-18	-19	-19	-13	-14	-10	-22	-8	-13	-10	-6	-7	-51	-50	-56	-57	-52	-54	17	13	-55	-49	-49	-47	-47	-47	-47	-41	-41	-46	-46	-45	-45	-53	-53	-62	-48	-47	-52	-47	-47	-8	-6	-6	-8	-12	-10
56	-9	-9	-12	-13	-13	-9	-10	-8	-22	0	-9	-6	2	1	-45	-44	-50	-51	-46	-46	22	18	-49	-45	-45	-39	-39	-39	-39	-33	-33	-42	-42	-35	-35	-45	-45	-54	-42	-41	-49	-44	-42	0	-2	0	0	-4	-6
57	-12	-12	-15	-14	-18	-12	-5	1	-21	-5	-4	-3	-5	-6	-50	-51	-53	-56	-53	-55	8	4	-56	-50	-50	-52	-52	-52	-52	-46	-46	-47	-47	-48	-48	-58	-58	-59	-51	-48	-47	-42	-46	-5	-1	-3	-5	-7	-1
58	-11	-11	-12	-15	-17	-11	-4	0	-12	4	5	4	2	1	-53	-54	-58	-63	-58	-60	5	-3	-53	-49	-49	-55	-55	-55	-55	-49	-49	-48	-50	-49	-49	-55	-55	-62	-48	-49	-50	-45	-45	4	8	8	2	-2	-6
59	-11	-11	-10	-17	-15	-11	-6	-2	-18	6	1	4	4	3	-51	-50	-56	-57	-52	-54	13	3	-49	-47	-47	-49	-49	-49	-49	-49	-49	-46	-46	-49	-49	-57	-57	-62	-48	-49	-46	-41	-45	6	6	6	4	2	2
60	-18	-18	-19	-20	-22	-18	-11	-5	-25	-1	-6	-3	1	0	-44	-43	-53	-56	-51	-53	8	0	-50	-44	-44	-48	-48	-48	-48	-42	-42	-45	-45	-44	-44	-54	-54	-59	-49	-48	-45	-40	-40	-1	1	1	1	-3	-1
61	-16	-16	-17	-18	-20	-14	-9	-1	-19	1	-4	-1	1	0	-48	-47	-57	-60	-53	-55	10	2	-54	-48	-48	-50	-50	-50	-50	-46	-46	-47	-47	-48	-48	-56	-56	-61	-49	-48	-49	-44	-44	1	3	3	1	-3	-1
62	-15	-15	-18	-19	-19	-15	-8	-4	-22	0	-7	-2	0	-1	-53	-52	-58	-63	-54	-56	9	3	-51	-51	-51	-51	-51	-51	-51	-47	-47	-50	-50	-51	-51	-61	-61	-62	-50	-51	-50	-45	-47	0	-2	2	0	-2	0
63	-18	-18	-9	-14	-12	-10	-13	-3	-15	15	6	11	15	14	-44	-43	-51	-54	-45	-47	6	-2	-40	-36	-36	-36	-36	-36	-36	-34	-34	-41	-41	-40	-40	-48	-48	-53	-43	-46	-43	-46	-52	-7	-7	-7	-7	-11	-9
64	-11	-11	-2	-9	-11	-5	-4	6	0	14	13	12	10	11	-51	-50	-60	-63	-56	-58	3	-7	-47	-43	-43	-49	-49	-49	-49	-45	-45	-44	-44	-53	-53	-57	-57	-62	-46	-49	-48	-51	-59	-14	-8	-12	-16	-20	-18
65	-13	-13	-10	-15	-15	-7	-12	2	-12	12	11	12	14	11	-53	-52	-58	-61	-54	-56	7	-1	-45	-43	-43	-43	-43	-43	-43	-41	-41	-46	-46	-47	-47	-55	-55	-58	-46	-51	-50	-53	-59	-12	-8	-8	-12	-14	-12
66	-11	-11	-8	-11	-11	-7	-4	4	-8	12	7	10	10	9	-45	-46	-52	-55	-50	-52	9	1	-43	-39	-39	-41	-41	-41	-41	-41	-41	-42	-44	-43	-43	-51	-51	-58	-46	-47	-42	-45	-51	-12	-10	-8	-14	-18	-16
67	-20	-20	-13	-22	-18	-16	-9	-7	-15	11	2	7	11	10	-48	-45	-53	-56	-47	-49	4	0	-40	-38	-38	-40	-40	-40	-40	-36	-36	-43	-43	-38	-38	-46	-46	-55	-41	-46	-41	-46	-52	-13	-13	-11	-11	-15	-15
68	-9	-9	-6	-7	-9	-7	-8	2	-14	6	11	10	4	3	-51	-50	-56	-59	-50	-52	-1	-9	-39	-39	-39	-45	-45	-45	-45	-45	-45	-40	-40	-49	-49	-57	-57	-56	-48	-49	-44	-47	-53	-16	-12	-12	-18	-18	-16
69	-10	-10	-11	-14	-14	-14	-7	-7	-3	-1	-2	-1	-5	-2	-50	-47	-55	-58	-55	-57	-2	-12	-44	-42	-42	-50	-50	-50	-50	-52	-52	-45	-47	-52	-52	-48	-48	-55	-45	-50	-43	-46	-52	-23	-21	-17	-23	-25	-21
70	-29	-29	-32	-29	-27	-31	-26	-28	-28	-22	-21	-20	-26	-23	-55	-50	-50	-53	-46	-48	-23	-33	-35	-37	-37	-41	-41	-41	-41	-49	-49	-42	-44	-57	-57	-57	-57	-50	-42	-47	-40	-45	-47	-42	-42	-40	-42	-40	-38
71	-20	-20	-17	-24	-20	-24	-9	-13	-19	-3	-6	-7	-3	-2	-32	-29	-39	-42	-35	-37	-4	-12	-28	-26	-26	-34	-34	-34	-34	-32	-32	-35	-35	-34	-34	-38	-38	-45	-31	-34	-33	-32	-44	-15	-13	-15	-11	-13	-9
72	-14	-14	-21	-20	-22	-24	-7	-11	-15	1	0	-1	1	2	-36	-35	-43	-44	-39	-39	-4	-16	-38	-34	-34	-40	-40	-40	-40	-40	-40	-35	-35	-34	-34	-40	-40	-45	-35	-38	-39	-38	-42	-9	-7	-9	-5	-7	-1
73	-21	-21	-18	-23	-21	-25	-10	-14	-26	-4	-5	-6	-4	-3	-35	-34	-40	-41	-38	-40	-5	-11	-33	-29	-29	-37	-37	-37	-37	-37	-37	-32	-32	-35	-35	-35	-35	-42	-30	-35	-36	-35	-43	-12	-12	-14	-10	-12	-6
74	-18	-18	-19	-26	-24	-24	-9	-15	-21	-7	-6	-9	-7	-4	-36	-33	-41	-40	-37	-37	-6	-14	-34	-30	-30	-34	-34	-34	-34	-38	-38	-31	-31	-36	-36	-36	-36	-41	-29	-34	-41	-40	-42	-15	-13	-17	-13	-13	-9
75	-20	-20	-16	-21	-17	-21	-9	-13	-17	-3	-4	-3	-3	-2	-30	-29	-33	-36	-31	-33	-9	-13	-25	-23	-23	-31	-31	-31	-31	-33	-33	-26	-26	-30	-30	-28	-28	-35	-29	-32	-31	-30	-40	-13	-11	-15	-11	-13	-7
76	-12	-12	-15	-20	-18	-18	-7	-13	-17	3	2	5	3	4	-36	-35	-39	-42	-35	-37	-2	-10	-28	-26	-26	-36	-36	-36	-36	-36	-36	-33	-33	-34	-34	-38	-38	-45	-35	-38	-33	-32	-42	-7	-7	-7	-5	-7	-1
77	1	1	8	-3	1	1	15	11	9	23	24	25	23	24	-5	-4	-8	-11	-6	-8	15	11	-3	-1	-1	-6	-6	-6	-6	-11	-11	-5	-5	-11	-11	-9	-9	-14	-6	-11	-12	-8	-21	16	18	16	18	16	22
78	-29	-29	-28	-27	-31	-33	-20	-18	-30	-10	-11	-14	-10	-9	-33	-28	-38	-39	-36	-36	-11	-23	-33	-29	-29	-37	-37	-37	-37	-39	-39	-30	-30	-31	-31	-33	-33	-40	-32	-37	-34	-33	-37	-18	-16	-20	-14	-14	-10
79	-15	-15	-16	-17	-17	-19	-12	-10	-24	0	-3	-2	-4	-3	-25	-26	-32	-33	-32	-32	-1	-11	-35	-31	-31	-33	-33	-33	-33	-33	-33	-26	-26	-27	-27	-31	-31	-36	-28	-29	-36	-33	-39	-6	-10	-8	-10	-10	-8
80	-9	-9	-30	-37	-31	-31	-18	-22	-26	-4	-9	-8	-6	-7	-27	-30	-32	-37	-34	-34	-33	-31	-47	-45	-45	-47	-47	-47	-47	-43	-43	-48	-48	-29	-29	-33	-33	-42	-32	-31	-24	-25	-31	-2	-2	-8	-6	-6	-12
81	-15	-15	-32	-41	-33	-33	-22	-24	-30	-8	-11	-10	-6	-7	-25	-26	-28	-33	-32	-32	-31	-29	-45	-41	-41	-43	-43	-43	-43	-37	-37	-46	-46	-21	-21	-27	-27	-38	-32	-31	-22	-23	-27	-6	-6	-10	-6	-8	-8
82	-15	-15	-32	-37	-35	-35	-20	-20	-28	-6	-7	-8	-6	-7	-33	-34	-40	-39	-38	-36	-31	-35	-53	-47	-47	-49	-49	-49	-49	-47	-47	-48	-48	-31	-31	-37	-37	-44	-34	-33	-32	-33	-35	-6	-4	-8	-6	-8	-12
83	-13	-13	-34	-41	-33	-33	-24	-20	-28	-10	-9	-8	-10	-11	-33	-34	-38	-41	-38	-38	-33	-35	-51	-47	-47	-53	-53	-53	-53	-43	-43	-54	-54	-29	-29	-35	-35	-44	-36	-33	-30	-31	-35	-10	-6	-10	-10	-12	-10
84	-14	-14	-35	-42	-34	-34	-23	-19	-27	-9	-8	-7	-9	-10	-32	-33	-37	-40	-37	-37	-32	-34	-50	-46	-46	-52	-52	-52	-52	-42	-42	-53	-53	-28	-28	-34	-34	-43	-35	-32	-29	-30	-34	-9	-5	-9	-9	-11	-9
85	-14	-14	-35	-42	-34	-34	-23	-19	-27	-9	-8	-7	-9	-10	-32	-33	-37	-40	-37	-37	-32	-34	-50	-46	-46	-52	-52	-52	-52	-42	-42	-53	-53	-28	-28	-34	-34	-43	-35	-32	-29	-30	-34	-9	-5	-9	-9	-11	-9
[truncated: 37 more columns]
